# Supplementary material
Source: PubMed Central journal article supplement (PMC3466556)

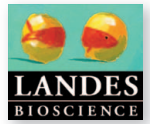

## **Supplemental Material to:**

**Zeng-Fu Shang, Lan Yu, Bing Li, Wen-Zhi Tu,  
Yu Wang, Xiao-Dan Liu, Hua Guan, Bo Huang,  
Wei-Qing Rang and Ping-Kun Zhou**

**4E-BP1 participates in maintaining the spindle integrity  
and genomic stability via interacting with PLK1**

**2012; 11(18)**

**<http://dx.doi.org/10.4161/cc.21770>**

**<http://www.landesbioscience.com/journals/cc/article/21770>**

**Supplemental Figure 1. Phosphorylated 4E-BP1 localized at centrosomes during mitosis.** (A) 293T cells were stained with anti-pT37/46 of 4E-BP1 and PLK1 antibodies and were examined by fluorescence microscopy. T37/46-phosphorylated 4E-BP1 overlapped with PLK1 at the centrosomes during mitosis. (B) HepG2 cells were stained with anti-pS65 of 4E-BP1 and PLK1 antibodies and were examined by fluorescence microscopy. Ser65-phosphorylated 4E-BP1 overlapped with PLK1 at the centrosomes during mitosis.

**Supplemental Figure 2. Suppression of 4E-BP1 has no effect on HepG2 growth under normal growing condition, and sensitizes HeLa cells to paclitaxel.** (A) HepG2 cells were transfected with 4E-BP1 siRNA and control si RNA, cells were plated in 96-well plates 24 hours after transfection. Cells viability was analyzed 0, 1, 2, 3, 4, 5 and 9d. The OD values were measured by MTT assay. The data are the ratio of OD values of the cells harvested at indicated times to the OD values of the cells on the initial day (0). (B) 24h following transfection with 4E-BP1 specific siRNA, HeLa cells were treated with paclitaxel at various concentrations. Cell growth potency was analyzed after the 72h treatment of paclitaxel using MTT assay. The data are the means and standard deviations from three independent experiments,  $**p < 0.01$ ,  $***p < 0.001$  as compared with the control siRNA-transfected cells under the same treatment of paclitaxel. (C) 24h following transfection with 4E-BP1 specific siRNA, HeLa cells were treated with 100 nM paclitaxel or DMSO as control for 24h. apoptotic cells were detected by using the annexin V and propidium iodide double staining method. The data are the means and standard deviations from three independent experiments.

Suppl Fig. 1

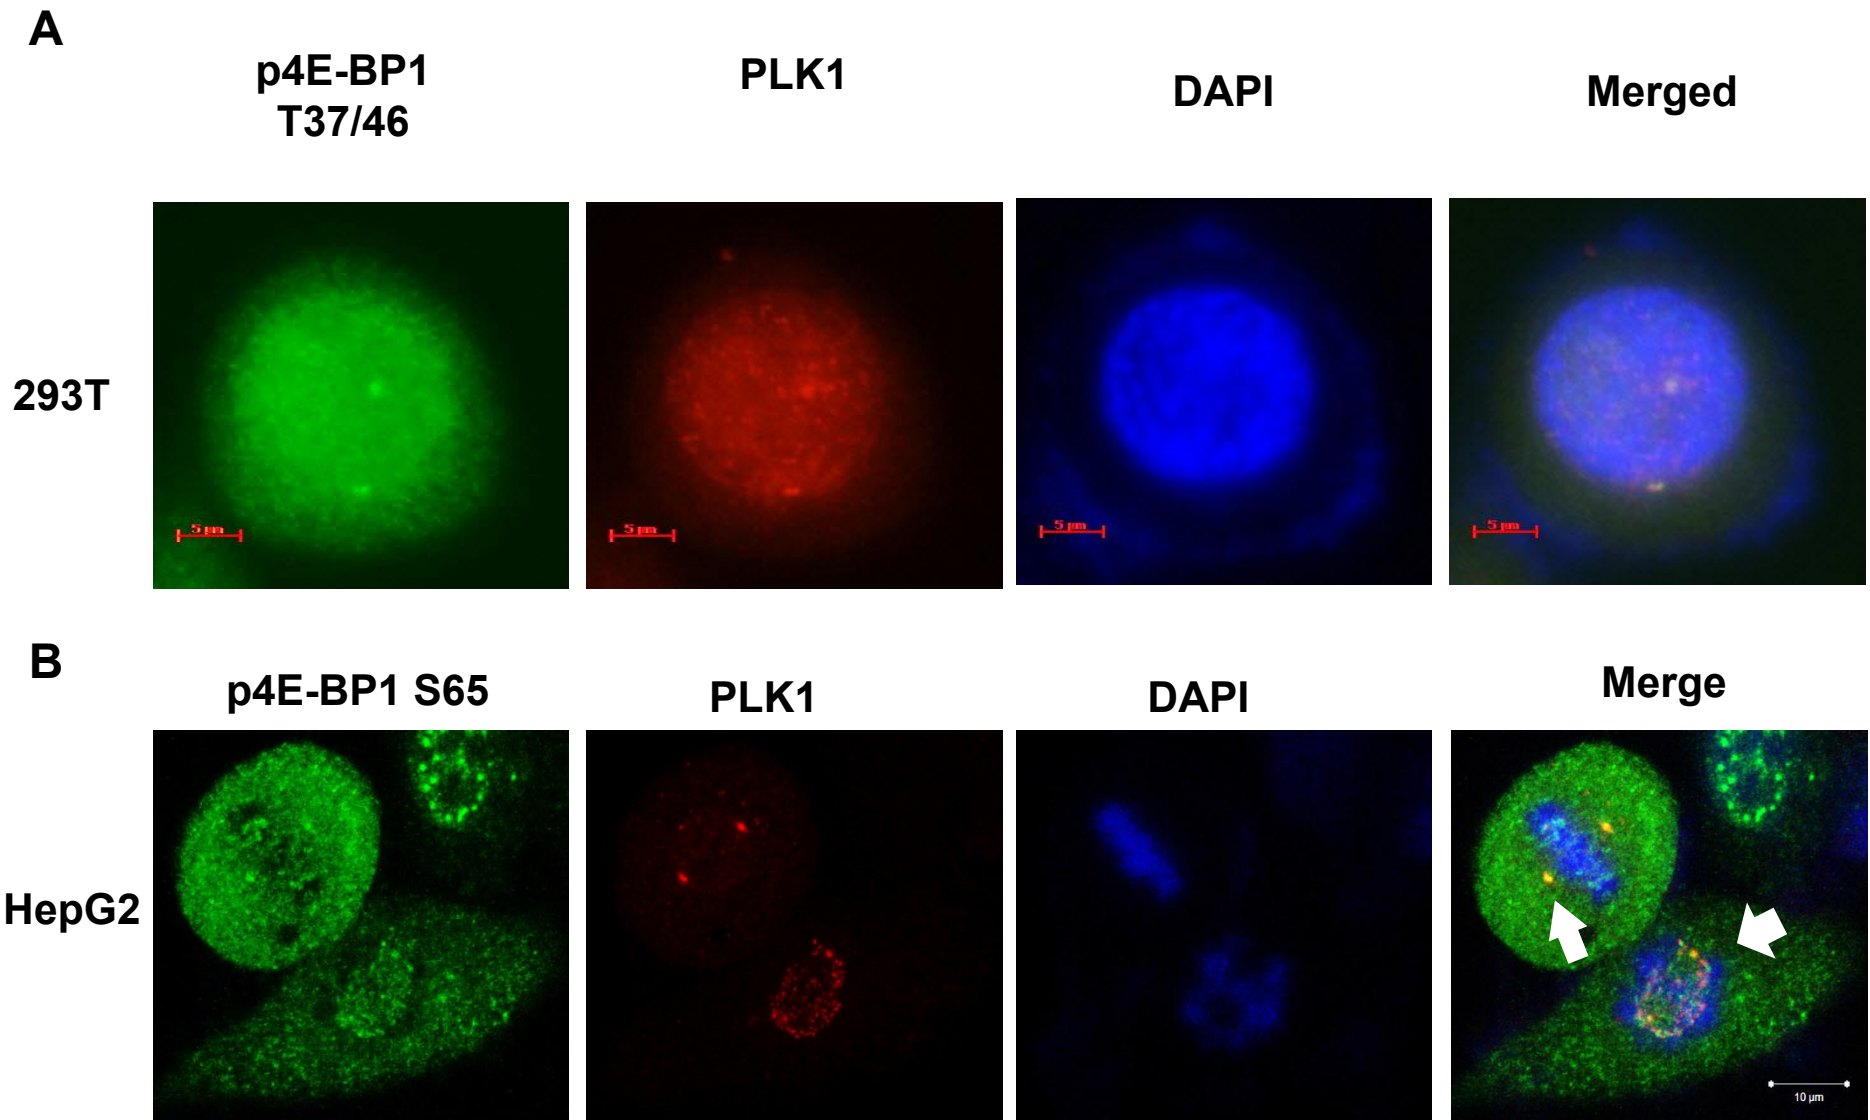

Supplemental Fig. 2

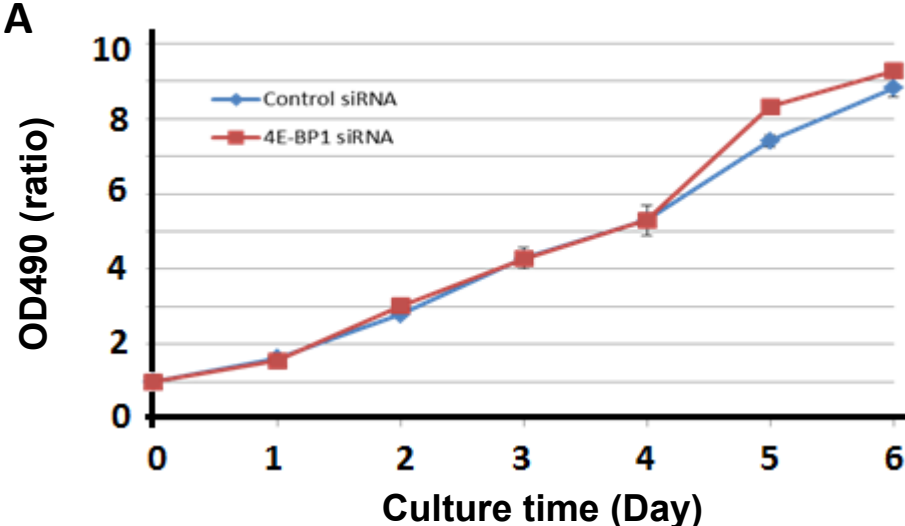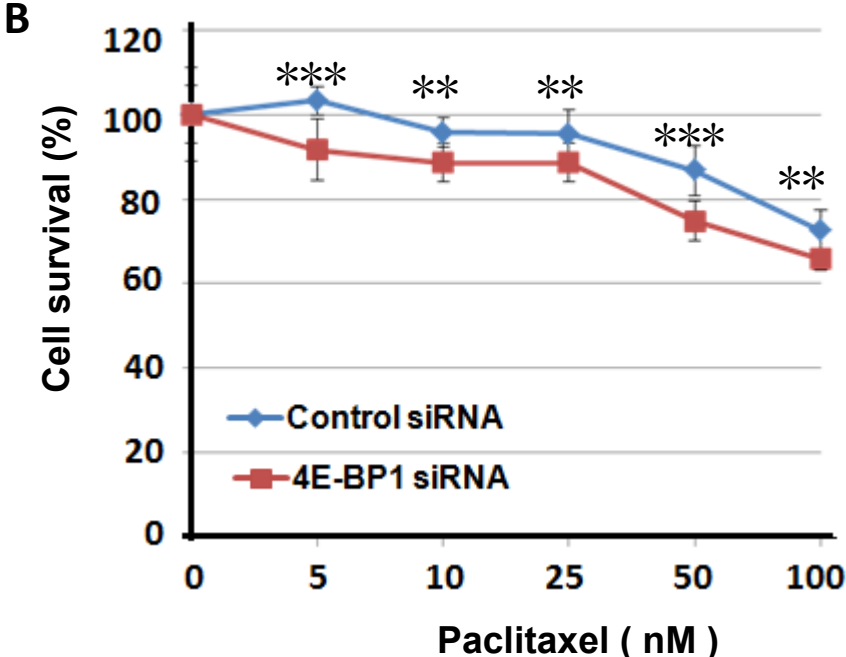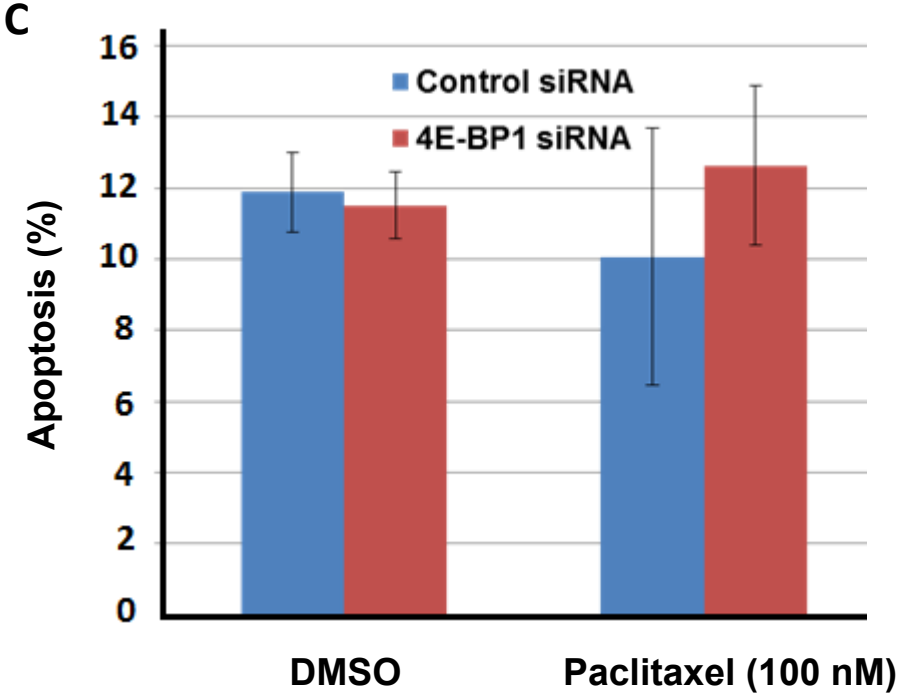

Supplement: cc-11-3463-s01.pdf [file cc-11-3463-s01.pdf]
